# Supplementary material
Source: PubMed Central journal article supplement (PMC4311811)
Supplement: pnas.201418812SI.pdf [file pnas.201418812SI.pdf]

# Supporting Information

Lu et al. 10.1073/pnas.1418812112

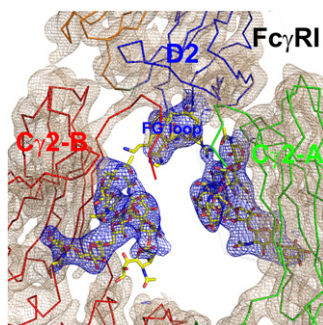

Fig. S1. Portion of the 2Fo-Fc electron density map ( $1\sigma$ ) of the Fc $\gamma$ RI and Fc complex, with glycan densities shown in blue.

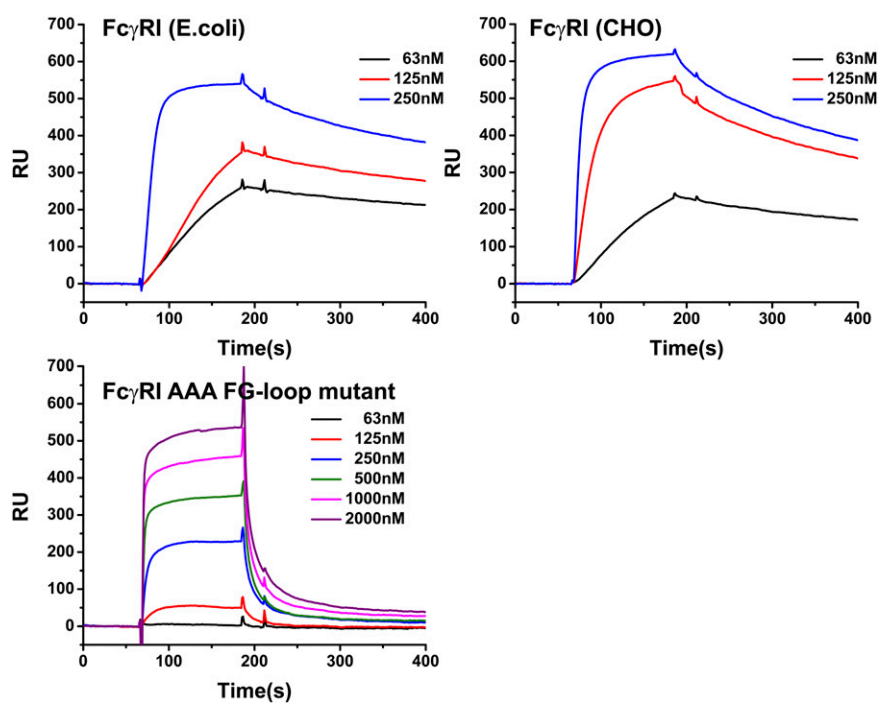

Fig. S2. Solution IgG<sub>4</sub> binding sensorgrams for serial dilutions of the WT and FG loop AAA mutant Fc $\gamma$ RI receptors.

**Table S1. X-ray crystallographic data collection and refinement statistics**

| Variable                             | Value                                                                        |
|--------------------------------------|------------------------------------------------------------------------------|
| <b>Data collection</b>               |                                                                              |
| Space group                          | P1                                                                           |
| Unit cell dimension, Å               | $a = 59.9, b = 68.0, c = 125.0; \alpha = 89.9, \beta = 112.3, \gamma = 90.0$ |
| Resolution range, Å                  | 50.0–3.50 (3.56–3.50)                                                        |
| Unique reflections                   | 20,950 (813)*                                                                |
| Average redundancy                   | 5.0 (1.5)*                                                                   |
| $R_{\text{merge}}, \%^\dagger$       | 13.5 (65.0)*                                                                 |
| $I/\sigma(I)$                        | 22.1 (1.0)*                                                                  |
| Completeness (%)                     | 91.5 (68.8)*                                                                 |
| <b>Refinement statistics</b>         |                                                                              |
| Refinement resolution, Å             | 40.6–3.50                                                                    |
| $R_{\text{cryst}}, \%^\ddagger$      | 24.5 (31.7) <sup>¶</sup>                                                     |
| $R_{\text{free}}, \%$                | 29.6 (34.6) <sup>¶</sup>                                                     |
| Protein atoms                        | 10,947                                                                       |
| Ligands                              | 16× NAG, 12× MAN, 4× FUC, 2× GAL, 1× SIA                                     |
| rmsd from ideal values               |                                                                              |
| Bond length, Å                       | 0.006                                                                        |
| Bond angle, °                        | 1.72                                                                         |
| Mean B-factor, Å <sup>2</sup>        | 183.0                                                                        |
| Wilson plot B-factor, Å <sup>2</sup> | 127.4                                                                        |
| <b>Ramachandran statistics</b>       |                                                                              |
| Most favored region, %               | 94.5                                                                         |
| Additionally allowed, %              | 5.5                                                                          |

\*Values for the highest-resolution shell in data collection (3.56–3.50 Å).

<sup>†</sup> $R_{\text{merge}} = \sum_h \sum_l |I_i(hkl) - \langle I(hkl) \rangle| / \sum_h \sum_l I_i(hkl)$ .

<sup>‡</sup> $R_{\text{cryst}} = \sum ||F_o| - |F_c|| / \sum |F_o|$  calculated from working dataset.  $R_{\text{free}}$  is calculated from 5.18% of the data randomly chosen to be excluded from refinement.

<sup>¶</sup>Values for the highest-resolution shell in structure refinement (3.67–3.50 Å).
